# Supplementary material for: Wnt1-cre-mediated Conditional Loss of Dicer Results in Malformation of the Midbrain and Cerebellum and Failure of Neural Crest and Dopaminergic Differentiation in Mice
Source: Oxford University Press journal article supplement (doi:10.1093/jmcb/mjq008), 2010-05-10

**Figure S1. *Wnt1-Cre* directed *lacZ* reporter expression in specific tissues.**

(**A, B**) Whole-mount X-gal staining was performed on *Wnt1<sup>cre</sup>;Tau-nLacZ* embryos at E12.5. A and B are the lateral and dorsal views, respectively. *LacZ* was expressed in the ventral diencephalon, mesencephalon, isthmus, cerebellum, trigeminal ganglion, cranial nerves VII, VIII and IX (arrowheads in A), spinal cord and dorsal root ganglia (arrowheads in B).

(**C-E**) *LacZ* was expressed in the E18.5 head region. C, D, and E are the lateral, dorsal and basal views, respectively. The neural crest derived skull elements are stained in blue. The arrowhead in C represents the tympanic ring and in E the dorsal root ganglia. cb, cerebellum; d, mandible; di, diencephalon; f, frontal bone; ip, interparietal bone; mes, mesencephalon; n, nasal bone; p, parietal bone; px, premaxilla; tel, telencephalon; tg, trigeminal ganglion; sc, spinal cord; x, maxilla.

Scale bars: 2 mm.

Wnt1<sup>Cre</sup>;Tau-nlacZ

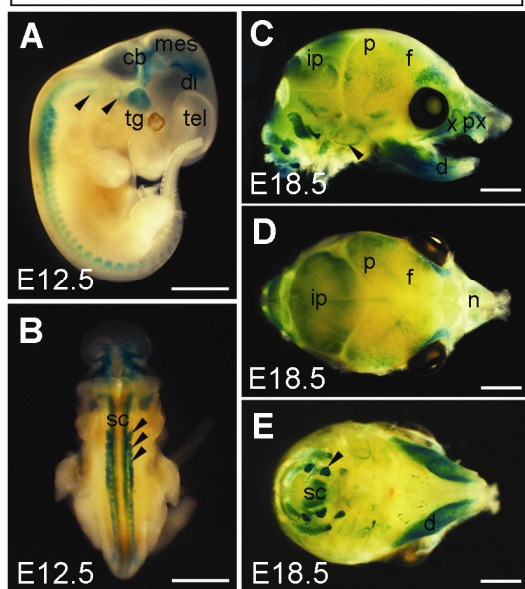

Supplement: mjq008_Supplementary_Data.zip [file mjq008_Supplementary_Data.zip]
