# Supplementary material for: Wnt1-cre-mediated Conditional Loss of Dicer Results in Malformation of the Midbrain and Cerebellum and Failure of Neural Crest and Dopaminergic Differentiation in Mice
Source: Oxford University Press journal article supplement (doi:10.1093/jmcb/mjq008), 2010-05-10
Supplement: mjq008_Supplementary_Data.zip [file mjq008_Supplementary_Data.zip]

Archive with 1 entries (1 files):
- mjq008supp.pdf
